# Supplementary material
Source: PubMed Central journal article supplement (PMC9596402)

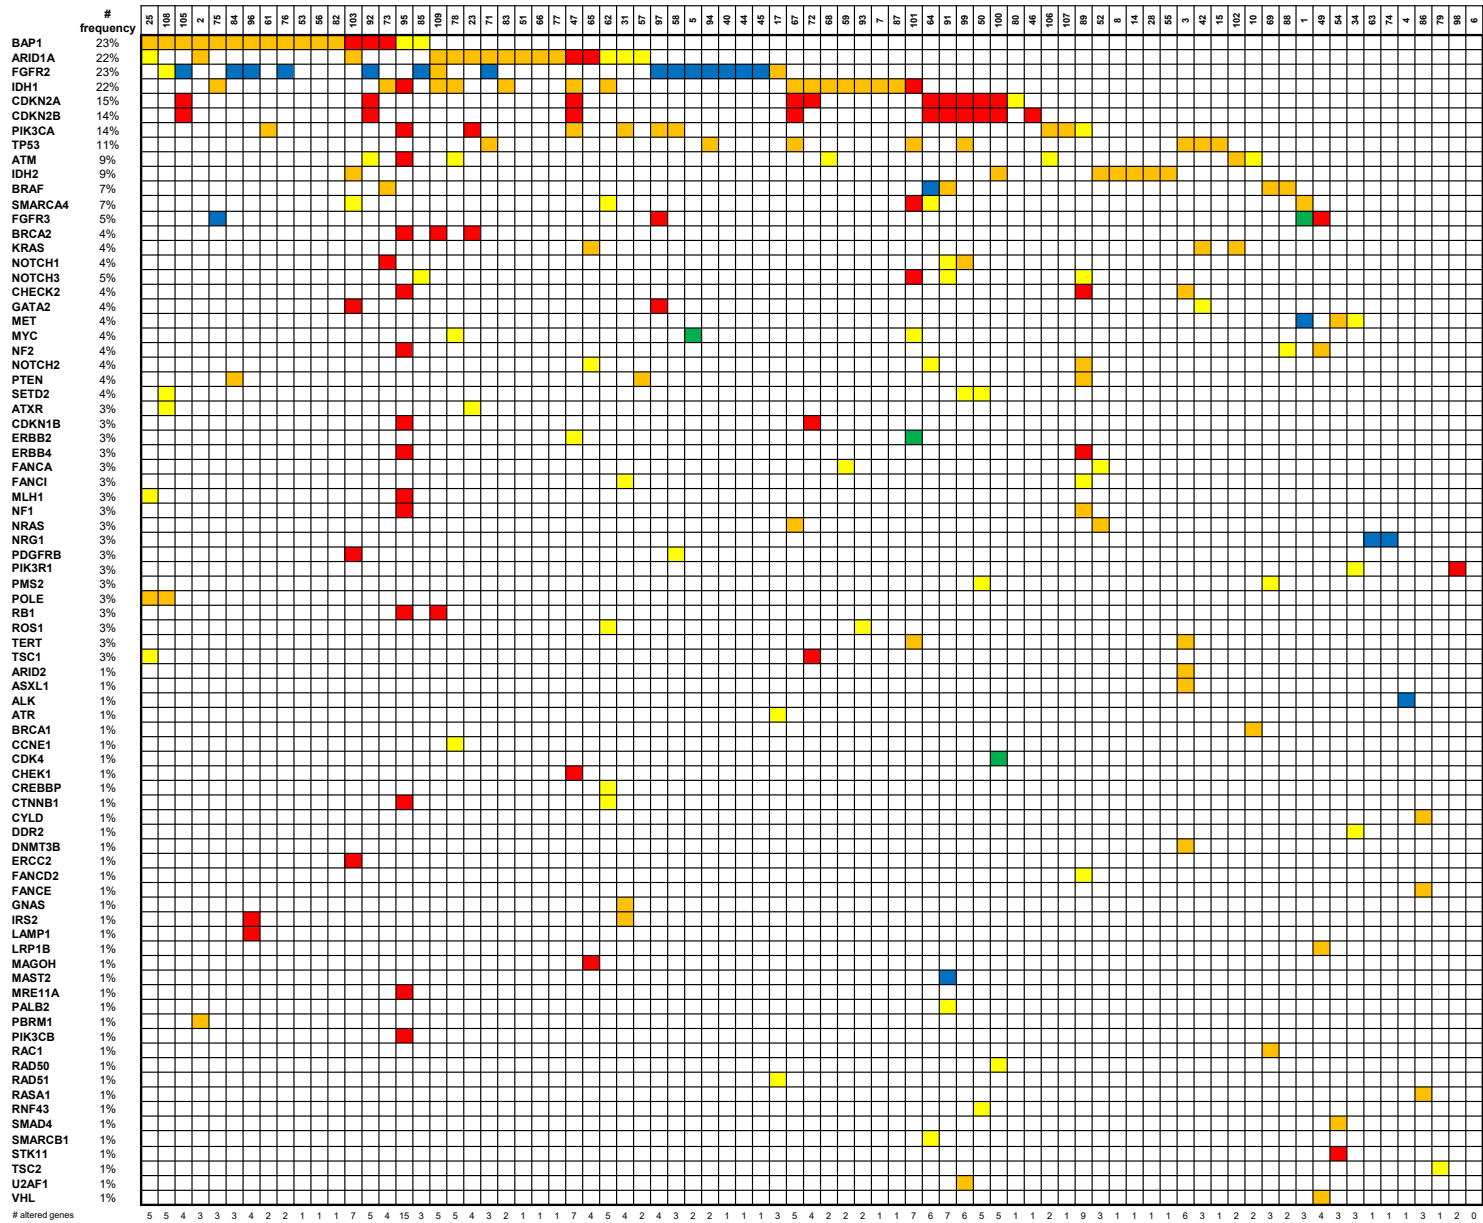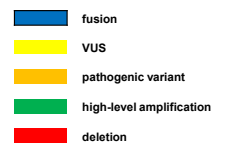

Supplement: 41416_2022_1932_MOESM4_ESM.pdf [file 41416_2022_1932_MOESM4_ESM.pdf]
